# Supplementary material for: Pathogenic Characteristics of a Porcine Astrovirus Strain Isolated in China
Source: PubMed Central journal article supplement (PMC6949928; doi:10.3390/v11121156), 2019-12-13
Supplement: viruses-11-01156-s001.pdf [file viruses-11-01156-s001.pdf]

Table S1: Primers used in this study

| Primer name      | Primer sequence 5'-3'         | Reference    |
|------------------|-------------------------------|--------------|
| PAstV 1F         | TCCTGTGCTATCAGTTGCTCTC        | GO914773     |
| PAstV 1R         | GATTGCTGGTTTTGGACCTGTG        |              |
| PAstV 2F         | AGCAGCTGGATCGTCTTTGGA         | JX556690     |
| PAstV 2R         | AGATTCAGCATCCCAGGTTGTT        |              |
| PAstV 4F         | TGGCTTCAGGCCTTTGAGTTTT        | JX556692     |
| PAstV 4R         | CACCGTCGTAGTAGTCGTGAC         |              |
| PAstV 5F         | TGGTACGTRCACAATCTGTTGAA       | JX556693     |
| PAstV5R          | TCAGTGTCTTCCCAACCRTC          |              |
| RV-P1            | AAATCCGCAACTATACTGTGTGACTA    | FI807867     |
| RV-P2            | TGGCCAACTGGTTCTGTCTA          |              |
| TGEV-P3          | CAACCCTGAAACTAACGCAATTCT      | FI755618     |
| TGEV-P4          | GCCCATCCAGTCGCACTACTT         |              |
| PEDV-P5          | AGGAACGTGACCTYAAAGACATCCC     | AF353511     |
| PEDV-P6          | GCCCATCCAGTCGCACTACTT         |              |
| PAstV-qF         | TGGCAAAGATGTCACTGTCAAGGTC     | NC 025379    |
| PAstV-qR         | CGTCTCTGGTTTAGAGTTGATGGTA     |              |
| AstV-M1F         | GCT ATA CCG GTG GTG CTG TTA T |              |
| AstV-M1R         | GAG TTC CTT GTT TGG GCC ATT   |              |
| AstV-M2F         | CACTCTGCGCCATTGAGAC           |              |
| AstV-M2R         | TCTCCACCTCGGCTTCTAAG          |              |
| AstV-M3F         | CAACCAACCCGGATGATGAT          |              |
| AstV-M3R         | GACATTCCGTCCTGCGTCTT          |              |
| TIP1-O3          | TTTTCTACTTGACCTCCCG           | XM 021098833 |
| TIP1-O4          | ATCTCCCACATCCGACTCTA          |              |
| TIP2-O3          | ATCTCCCACATCCGACTCTA          |              |
| TIP2-O4          | ATCTCCCACATCCGACTCTA          |              |
| ZO-1 O3          | GCCGCCTCCTGAGTTTGA            | AU318101     |
| ZO-1 O4          | ACCCCGCCGTTGCTGTTA            |              |
| IL-8 F           | CCGTGTCAACATGACTTCCAA         | MM 2138671   |
| IL-8 R           | GCCTCACAGAGAGCTGCAGAA         |              |
| IL-12 F          | AACTCTTCACGGACCAAATCTCA       | MM 2138671   |
| IL-12 R          | GGTCCCGGGCTTGCA               |              |
| IFN- $\beta$ F   | GCTCTCCTGATGTGTTTCTC          | KI147517     |
| IFN- $\beta$ R   | AGGGACCTCAAAGTTCATCC          |              |
| ISG54 F          | AAGAACTCCTTGAGAGCTG           | IX070559     |
| ISG54 R          | CCTGTATGTTGCACATCGTG          |              |
| $\beta$ -actin F | CTCCATCATGAAGTGGCAGCT         | U07786       |
| $\beta$ -actin R | GTGATCTCCTTCTGCATCCTGTC       |              |
